# Supplementary material for: ITS2 metabarcoding analysis complements lichen mycobiome diversity data
Source: Springer Nature journal article supplement (doi:10.1007/s11557-018-1415-4), 2018-06-22
Supplement: MOESM1 [file 11557_2018_1415_MOESM1_ESM.pdf]

## **Supplementary material**

### **ITS2 metabarcoding analysis complements lichen mycobiome diversity data**

Elisa Banchi<sup>1</sup>, David Stankovic<sup>1,2</sup>, Fernando Fernández-Mendoza<sup>3</sup>, Fabrizia Gionechetti<sup>1</sup>, Alberto Pallavicini<sup>1</sup>, Lucia Muggia<sup>1\*</sup>

**Supplementary Fig. 1** Rarefaction curves of the complete (A), “no host” (B) and “no myco” (C) datasets.

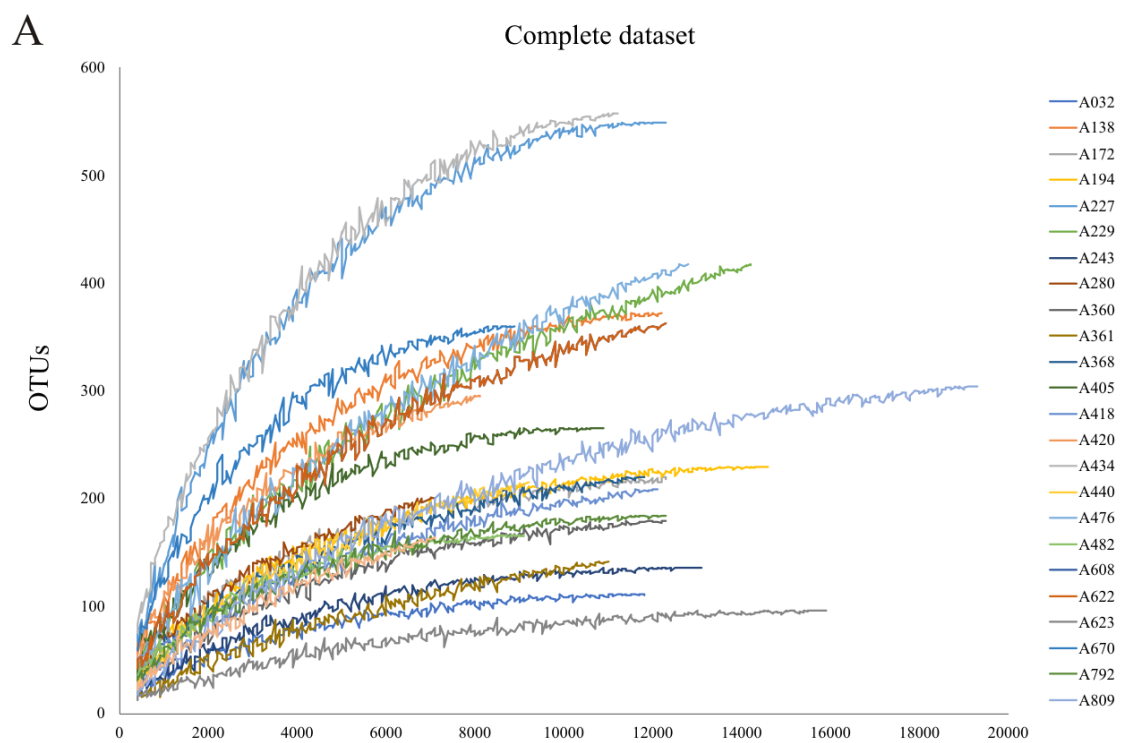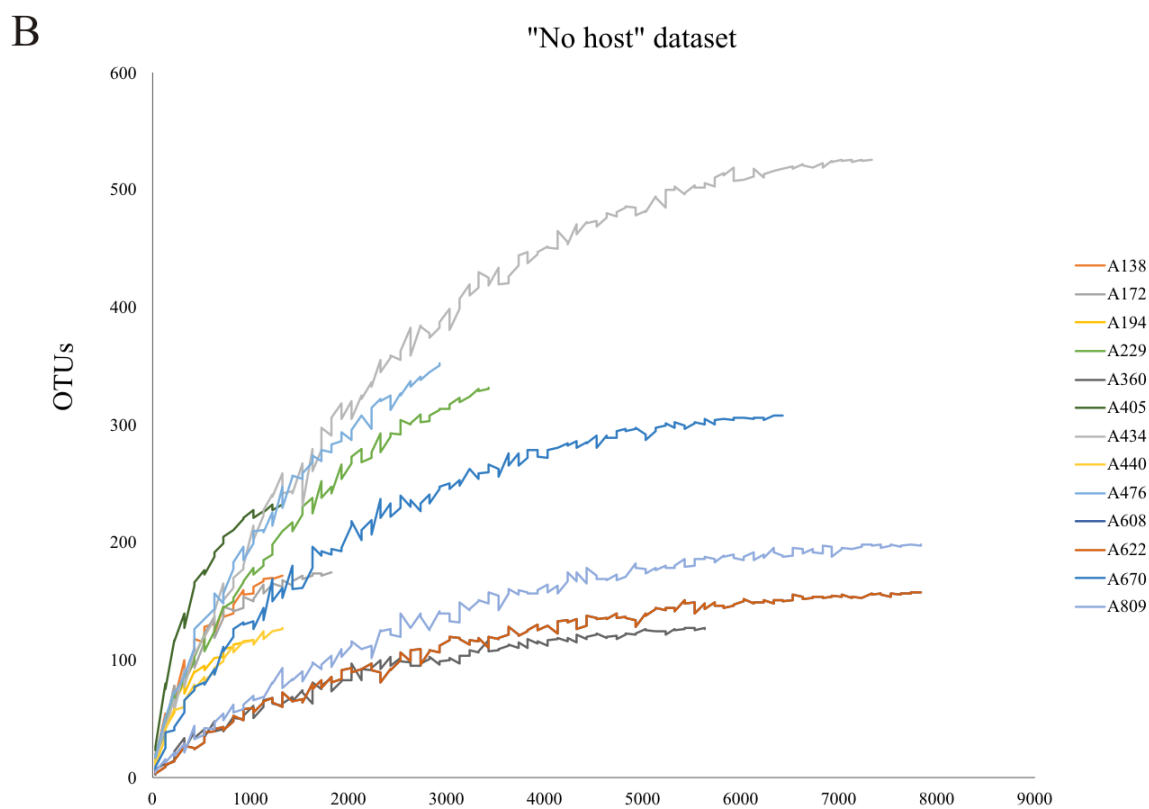

C

"No myco" dataset

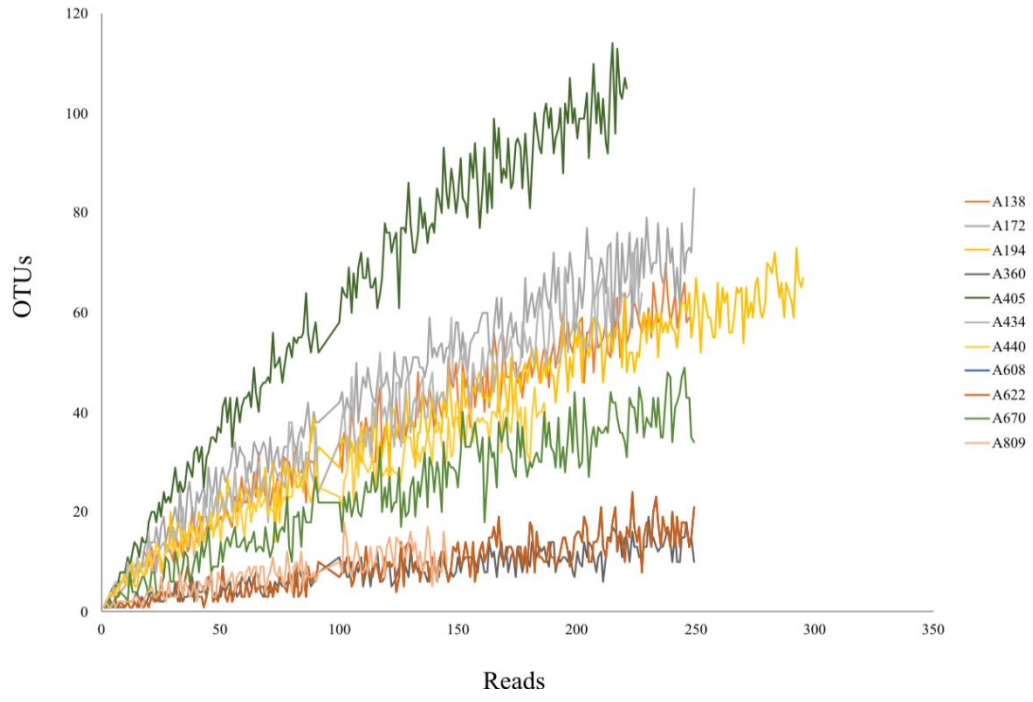

**Supplementary Fig. 2** Principal Coordinate Analysis (PCoA) plots of Bray-Curtis distances calculated among the lichen mycobiomes considering the complete dataset.

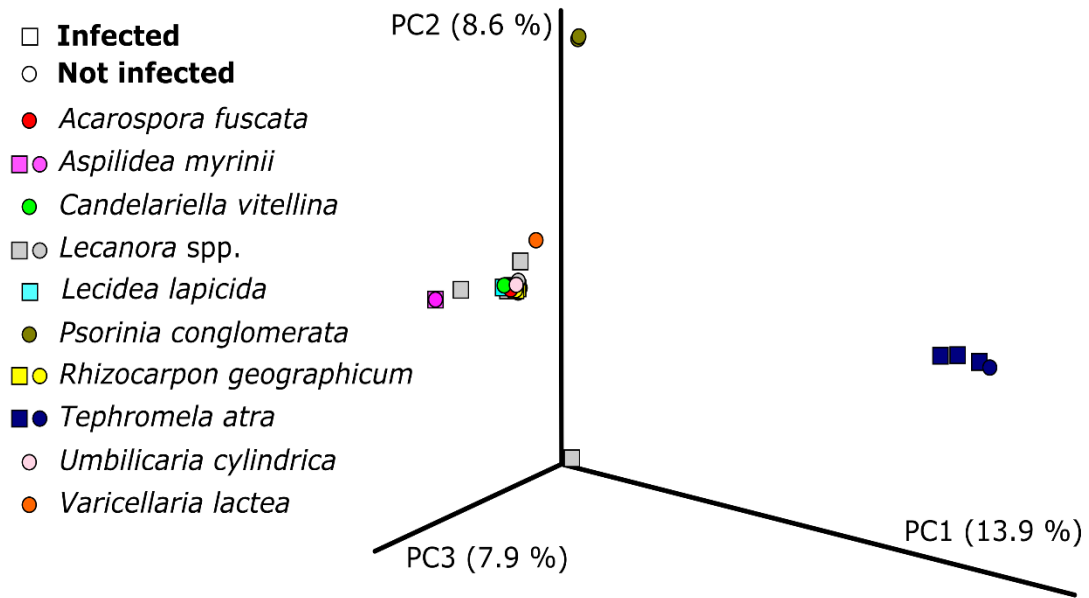

**Supplementary Fig. 3** Jackknifed Principal Coordinate Analysis (PCoA) plots of Bray-Curtis distances based on the “no host” (A) and “no myco” (B) datasets. The statistical confidence of the results is presented by ellipsoids around the samples.

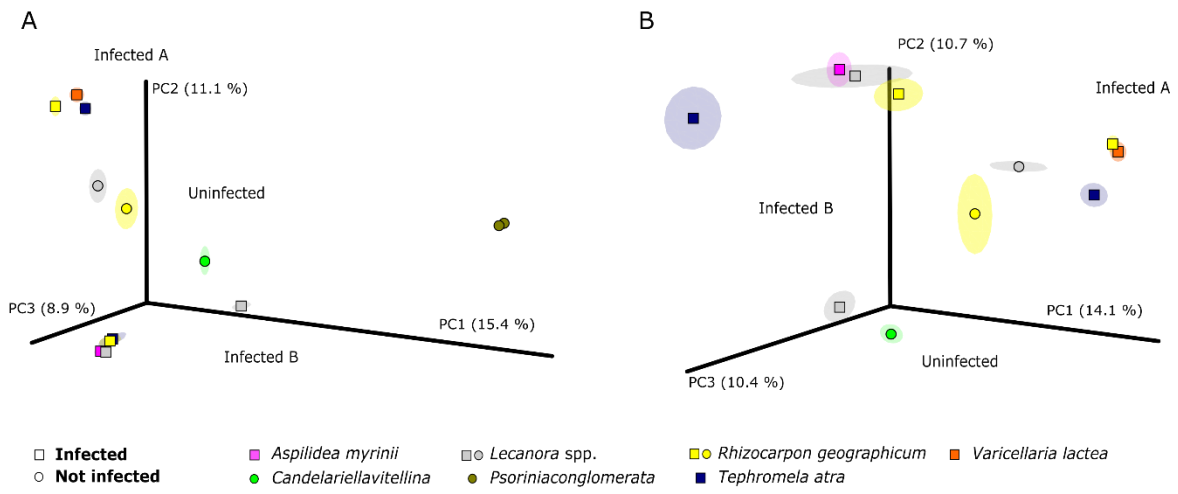

**Supplementary Table 1** Matrix of the shared OTUs among samples in the complete dataset used for Fig. 6A.

|      | A229 | A138 | A792 | A194 | A440 | A361 | A280 | A809 | A032 | A360 | A622 | A172 | A227 | A832 | A405 | A670 | A418 | A636 | A623 | A482 | A476 | A434 | A243 | A608 | A368 | A420 |
|------|------|------|------|------|------|------|------|------|------|------|------|------|------|------|------|------|------|------|------|------|------|------|------|------|------|------|
| A229 | 417  | 0    | 5    | 3    | 7    | 5    | 8    | 3    | 3    | 10   | 41   | 4    | 4    | 3    | 3    | 3    | 6    | 2    | 3    | 3    | 307  | 4    | 2    | 5    | 1    | 4    |
| A138 | 0    | 372  | 3    | 3    | 13   | 3    | 20   | 5    | 7    | 12   | 14   | 5    | 1    | 2    | 1    | 17   | 2    | 0    | 4    | 7    | 14   | 2    | 7    | 0    | 2    | 1    |
| A792 | 5    | 3    | 184  | 1    | 5    | 1    | 9    | 3    | 3    | 4    | 6    | 1    | 1    | 2    | 2    | 7    | 11   | 1    | 8    | 6    | 4    | 6    | 3    | 7    | 1    | 5    |
| A194 | 3    | 3    | 1    | 229  | 8    | 1    | 6    | 2    | 6    | 10   | 13   | 7    | 1    | 1    | 2    | 3    | 2    | 0    | 6    | 6    | 1    | 0    | 0    | 1    | 0    | 0    |
| A440 | 7    | 13   | 5    | 8    | 215  | 69   | 73   | 60   | 14   | 27   | 29   | 8    | 2    | 5    | 3    | 8    | 10   | 1    | 5    | 8    | 7    | 4    | 3    | 4    | 0    | 2    |
| A361 | 5    | 3    | 1    | 1    | 69   | 141  | 66   | 76   | 3    | 9    | 8    | 1    | 1    | 1    | 1    | 1    | 1    | 1    | 1    | 3    | 3    | 1    | 0    | 1    | 0    | 1    |
| A280 | 8    | 20   | 9    | 6    | 73   | 66   | 201  | 58   | 12   | 19   | 23   | 11   | 4    | 6    | 3    | 17   | 9    | 1    | 6    | 7    | 8    | 7    | 6    | 4    | 3    | 4    |
| A809 | 3    | 5    | 3    | 2    | 60   | 76   | 58   | 304  | 8    | 10   | 12   | 2    | 5    | 3    | 2    | 3    | 4    | 1    | 5    | 5    | 2    | 3    | 1    | 1    | 3    | 3    |
| A032 | 3    | 7    | 3    | 6    | 14   | 3    | 12   | 8    | 111  | 12   | 16   | 9    | 2    | 5    | 4    | 6    | 3    | 1    | 3    | 4    | 3    | 1    | 2    | 1    | 5    | 2    |
| A360 | 10   | 12   | 4    | 10   | 27   | 9    | 19   | 10   | 12   | 179  | 30   | 10   | 4    | 7    | 4    | 9    | 9    | 1    | 6    | 9    | 10   | 5    | 2    | 1    | 3    | 2    |
| A622 | 41   | 14   | 6    | 13   | 29   | 8    | 23   | 12   | 16   | 30   | 326  | 9    | 4    | 7    | 9    | 11   | 7    | 3    | 5    | 15   | 42   | 4    | 4    | 17   | 4    | 18   |
| A172 | 4    | 5    | 1    | 7    | 8    | 1    | 11   | 2    | 9    | 10   | 9    | 221  | 3    | 3    | 5    | 4    | 4    | 1    | 4    | 2    | 2    | 0    | 1    | 0    | 0    | 0    |
| A227 | 4    | 1    | 1    | 1    | 2    | 1    | 4    | 5    | 2    | 4    | 4    | 3    | 549  | 3    | 4    | 3    | 7    | 1    | 4    | 2    | 0    | 2    | 2    | 1    | 2    | 1    |
| A832 | 3    | 2    | 2    | 1    | 5    | 1    | 6    | 3    | 5    | 7    | 7    | 3    | 3    | 164  | 2    | 4    | 7    | 2    | 3    | 3    | 1    | 2    | 1    | 5    | 131  | 4    |
| A405 | 3    | 1    | 2    | 2    | 3    | 1    | 3    | 2    | 4    | 4    | 9    | 5    | 4    | 2    | 265  | 4    | 4    | 1    | 3    | 3    | 1    | 0    | 1    | 0    | 1    | 1    |
| A670 | 3    | 17   | 7    | 3    | 8    | 1    | 17   | 3    | 6    | 9    | 11   | 4    | 3    | 4    | 4    | 360  | 10   | 2    | 5    | 7    | 55   | 6    | 2    | 2    | 3    | 2    |
| A418 | 6    | 2    | 11   | 2    | 10   | 1    | 9    | 4    | 3    | 9    | 7    | 4    | 7    | 7    | 4    | 10   | 208  | 2    | 5    | 5    | 3    | 120  | 2    | 9    | 1    | 7    |
| A636 | 2    | 0    | 1    | 0    | 1    | 1    | 1    | 1    | 1    | 1    | 3    | 1    | 1    | 2    | 1    | 2    | 2    | 52   | 1    | 0    | 0    | 0    | 0    | 1    | 0    | 0    |
| A623 | 3    | 4    | 8    | 6    | 5    | 1    | 6    | 5    | 3    | 6    | 5    | 4    | 4    | 3    | 3    | 5    | 5    | 1    | 96   | 5    | 1    | 6    | 1    | 2    | 1    | 3    |
| A482 | 3    | 7    | 6    | 6    | 8    | 3    | 7    | 5    | 4    | 9    | 15   | 2    | 2    | 3    | 3    | 7    | 5    | 0    | 5    | 166  | 8    | 3    | 2    | 4    | 2    | 5    |
| A476 | 307  | 14   | 4    | 1    | 7    | 3    | 8    | 2    | 3    | 10   | 42   | 2    | 0    | 1    | 1    | 55   | 3    | 0    | 1    | 8    | 417  | 1    | 2    | 0    | 1    | 0    |
| A434 | 4    | 2    | 6    | 0    | 4    | 1    | 7    | 3    | 1    | 5    | 4    | 0    | 2    | 2    | 0    | 6    | 120  | 0    | 6    | 3    | 1    | 557  | 1    | 4    | 1    | 6    |
| A243 | 2    | 7    | 3    | 0    | 3    | 0    | 6    | 1    | 2    | 2    | 4    | 1    | 2    | 1    | 1    | 2    | 2    | 0    | 1    | 2    | 2    | 1    | 135  | 2    | 3    | 2    |
| A608 | 5    | 0    | 7    | 1    | 4    | 1    | 4    | 1    | 1    | 1    | 17   | 0    | 1    | 5    | 0    | 2    | 9    | 1    | 2    | 4    | 0    | 4    | 2    | 362  | 3    | 231  |
| A368 | 1    | 2    | 1    | 0    | 0    | 0    | 3    | 3    | 5    | 3    | 4    | 0    | 2    | 131  | 1    | 3    | 1    | 0    | 1    | 2    | 1    | 1    | 3    | 3    | 220  | 2    |
| A420 | 4    | 1    | 5    | 0    | 2    | 1    | 4    | 3    | 2    | 2    | 18   | 0    | 1    | 4    | 1    | 2    | 7    | 0    | 3    | 5    | 0    | 6    | 2    | 231  | 2    | 295  |

**Supplementary Table 2** Matrix of the shared OTUs among samples in the “no host” dataset used for Fig. 6B.

|      | A032 | A138 | A172 | A194 | A227 | A229 | A243 | A280 | A360 | A361 | A368 | A405 | A418 | A420 | A434 | A440 | A476 | A482 | A608 | A622 | A623 | A636 | A670 | A792 | A809 | A832 |
|------|------|------|------|------|------|------|------|------|------|------|------|------|------|------|------|------|------|------|------|------|------|------|------|------|------|------|
| A032 | 35   | 7    | 8    | 6    | 1    | 2    | 0    | 9    | 9    | 1    | 0    | 1    | 2    | 1    | 0    | 10   | 3    | 4    | 0    | 11   | 1    | 0    | 5    | 2    | 4    | 3    |
| A138 | 7    | 172  | 5    | 3    | 1    | 0    | 4    | 19   | 10   | 2    | 0    | 1    | 2    | 1    | 2    | 13   | 13   | 7    | 0    | 13   | 3    | 0    | 16   | 3    | 4    | 2    |
| A172 | 8    | 5    | 175  | 5    | 1    | 1    | 0    | 8    | 6    | 0    | 0    | 2    | 1    | 0    | 0    | 6    | 1    | 2    | 0    | 7    | 1    | 0    | 3    | 0    | 0    | 3    |
| A194 | 6    | 3    | 5    | 117  | 0    | 1    | 0    | 5    | 8    | 0    | 0    | 1    | 1    | 0    | 0    | 6    | 0    | 6    | 1    | 11   | 4    | 0    | 3    | 1    | 0    | 1    |
| A227 | 1    | 1    | 1    | 0    | 22   | 2    | 0    | 0    | 1    | 0    | 0    | 0    | 0    | 0    | 1    | 1    | 0    | 1    | 0    | 1    | 1    | 0    | 1    | 0    | 1    | 2    |
| A229 | 2    | 0    | 1    | 1    | 2    | 332  | 0    | 2    | 5    | 2    | 0    | 1    | 2    | 2    | 2    | 3    | 250  | 1    | 2    | 33   | 0    | 0    | 1    | 2    | 1    | 1    |
| A243 | 0    | 4    | 0    | 0    | 0    | 0    | 64   | 3    | 1    | 0    | 2    | 0    | 1    | 0    | 0    | 3    | 2    | 0    | 0    | 3    | 1    | 0    | 1    | 2    | 0    | 0    |
| A280 | 9    | 19   | 8    | 5    | 0    | 2    | 3    | 90   | 14   | 7    | 0    | 1    | 5    | 2    | 3    | 31   | 8    | 5    | 1    | 18   | 4    | 0    | 14   | 5    | 8    | 3    |
| A360 | 9    | 10   | 6    | 8    | 1    | 5    | 1    | 14   | 127  | 2    | 1    | 1    | 5    | 0    | 4    | 21   | 6    | 7    | 0    | 24   | 3    | 0    | 8    | 2    | 3    | 4    |
| A361 | 1    | 2    | 0    | 0    | 0    | 2    | 0    | 7    | 2    | 26   | 0    | 0    | 0    | 0    | 0    | 12   | 2    | 2    | 0    | 3    | 0    | 0    | 0    | 0    | 11   | 0    |
| A368 | 0    | 0    | 0    | 0    | 0    | 0    | 2    | 0    | 1    | 0    | 17   | 1    | 0    | 0    | 0    | 0    | 1    | 0    | 0    | 4    | 0    | 0    | 0    | 0    | 1    | 6    |
| A405 | 1    | 1    | 2    | 1    | 0    | 1    | 0    | 1    | 1    | 0    | 1    | 232  | 1    | 0    | 0    | 1    | 1    | 2    | 0    | 5    | 1    | 0    | 2    | 0    | 0    | 1    |
| A418 | 2    | 2    | 1    | 1    | 0    | 2    | 1    | 5    | 5    | 0    | 0    | 1    | 147  | 4    | 94   | 7    | 2    | 4    | 5    | 5    | 2    | 0    | 6    | 5    | 0    | 3    |
| A420 | 1    | 1    | 0    | 0    | 0    | 2    | 0    | 2    | 0    | 0    | 0    | 0    | 4    | 61   | 3    | 1    | 0    | 2    | 44   | 3    | 1    | 0    | 1    | 3    | 2    | 1    |
| A434 | 0    | 2    | 0    | 0    | 1    | 2    | 0    | 3    | 4    | 0    | 0    | 0    | 94   | 3    | 526  | 2    | 1    | 2    | 1    | 3    | 5    | 0    | 3    | 2    | 1    | 0    |
| A440 | 10   | 13   | 6    | 6    | 1    | 3    | 3    | 31   | 21   | 12   | 0    | 1    | 7    | 1    | 2    | 129  | 5    | 7    | 3    | 23   | 3    | 0    | 7    | 4    | 12   | 3    |
| A476 | 3    | 13   | 1    | 0    | 0    | 250  | 2    | 8    | 6    | 2    | 1    | 1    | 2    | 0    | 1    | 5    | 352  | 7    | 0    | 38   | 0    | 0    | 55   | 4    | 2    | 0    |
| A482 | 4    | 7    | 2    | 6    | 1    | 1    | 0    | 5    | 7    | 2    | 0    | 2    | 4    | 2    | 2    | 7    | 7    | 79   | 0    | 12   | 4    | 0    | 6    | 5    | 5    | 2    |
| A608 | 0    | 0    | 0    | 1    | 0    | 2    | 0    | 1    | 0    | 0    | 0    | 0    | 5    | 44   | 1    | 3    | 0    | 0    | 158  | 2    | 1    | 0    | 1    | 1    | 1    | 1    |
| A622 | 11   | 13   | 7    | 11   | 1    | 33   | 3    | 18   | 24   | 3    | 4    | 5    | 5    | 3    | 3    | 23   | 38   | 12   | 2    | 204  | 3    | 1    | 10   | 4    | 8    | 6    |
| A623 | 1    | 3    | 1    | 4    | 1    | 0    | 1    | 4    | 3    | 0    | 0    | 1    | 2    | 1    | 5    | 3    | 0    | 4    | 1    | 3    | 19   | 0    | 3    | 1    | 2    | 1    |
| A636 | 0    | 0    | 0    | 0    | 0    | 0    | 0    | 0    | 0    | 0    | 0    | 0    | 0    | 0    | 0    | 0    | 0    | 0    | 0    | 1    | 0    | 37   | 0    | 0    | 0    | 0    |
| A670 | 5    | 16   | 3    | 3    | 1    | 1    | 1    | 14   | 8    | 0    | 0    | 2    | 6    | 1    | 3    | 7    | 55   | 6    | 1    | 10   | 3    | 0    | 308  | 5    | 1    | 2    |
| A792 | 2    | 3    | 0    | 1    | 0    | 2    | 2    | 5    | 2    | 0    | 0    | 0    | 5    | 3    | 2    | 4    | 4    | 5    | 1    | 4    | 1    | 0    | 5    | 128  | 1    | 1    |
| A809 | 4    | 4    | 0    | 0    | 1    | 1    | 0    | 8    | 3    | 11   | 1    | 0    | 0    | 2    | 1    | 12   | 2    | 5    | 1    | 8    | 2    | 0    | 1    | 1    | 198  | 1    |
| A832 | 3    | 2    | 3    | 1    | 2    | 1    | 0    | 3    | 4    | 0    | 6    | 1    | 3    | 1    | 0    | 3    | 0    | 2    | 1    | 6    | 1    | 0    | 2    | 1    | 1    | 23   |

**Supplementary Table 3** Matrix of the shared OTUs among samples in the “no myco” dataset used for Fig. 6C.

|      | A032 | A138 | A172 | A194 | A227 | A229 | A243 | A280 | A360 | A361 | A368 | A405 | A418 | A420 | A434 | A440 | A476 | A482 | A608 | A622 | A623 | A636 | A670 | A792 | A809 | A832 |
|------|------|------|------|------|------|------|------|------|------|------|------|------|------|------|------|------|------|------|------|------|------|------|------|------|------|------|
| A032 | 19   | 6    | 6    | 6    | 0    | 0    | 0    | 8    | 9    | 1    | 0    | 1    | 2    | 0    | 0    | 10   | 2    | 3    | 0    | 9    | 1    | 0    | 5    | 1    | 3    | 1    |
| A138 | 6    | 131  | 5    | 3    | 1    | 0    | 4    | 18   | 10   | 2    | 0    | 1    | 2    | 0    | 2    | 12   | 13   | 6    | 0    | 12   | 3    | 0    | 16   | 2    | 3    | 1    |
| A172 | 6    | 5    | 172  | 5    | 0    | 0    | 0    | 8    | 6    | 0    | 0    | 2    | 1    | 0    | 0    | 6    | 1    | 2    | 0    | 6    | 1    | 0    | 3    | 0    | 0    | 1    |
| A194 | 6    | 3    | 5    | 109  | 0    | 0    | 0    | 5    | 8    | 0    | 0    | 1    | 1    | 0    | 0    | 6    | 0    | 5    | 1    | 10   | 3    | 0    | 3    | 0    | 0    | 1    |
| A227 | 0    | 1    | 0    | 0    | 9    | 0    | 0    | 0    | 1    | 0    | 0    | 0    | 0    | 0    | 1    | 1    | 0    | 1    | 0    | 1    | 1    | 0    | 1    | 0    | 1    | 1    |
| A229 | 0    | 0    | 0    | 0    | 0    | 64   | 0    | 2    | 3    | 2    | 0    | 1    | 2    | 1    | 2    | 3    | 51   | 0    | 1    | 3    | 0    | 0    | 1    | 1    | 1    | 0    |
| A243 | 0    | 4    | 0    | 0    | 0    | 0    | 18   | 3    | 0    | 0    | 0    | 0    | 0    | 0    | 0    | 2    | 1    | 0    | 0    | 1    | 1    | 0    | 1    | 2    | 0    | 0    |
| A280 | 8    | 18   | 8    | 5    | 0    | 2    | 3    | 87   | 14   | 7    | 0    | 1    | 4    | 1    | 3    | 30   | 8    | 4    | 1    | 16   | 4    | 0    | 14   | 4    | 7    | 1    |
| A360 | 9    | 10   | 6    | 8    | 1    | 3    | 0    | 14   | 77   | 2    | 0    | 1    | 4    | 0    | 4    | 21   | 4    | 6    | 0    | 21   | 3    | 0    | 8    | 2    | 3    | 4    |
| A361 | 1    | 2    | 0    | 0    | 0    | 2    | 0    | 7    | 2    | 25   | 0    | 0    | 0    | 0    | 0    | 12   | 2    | 2    | 0    | 3    | 0    | 0    | 0    | 0    | 11   | 0    |
| A368 | 0    | 0    | 0    | 0    | 0    | 0    | 0    | 0    | 0    | 0    | 2    | 1    | 0    | 0    | 0    | 0    | 1    | 0    | 0    | 1    | 0    | 0    | 0    | 0    | 0    | 1    |
| A405 | 1    | 1    | 2    | 1    | 0    | 1    | 0    | 1    | 1    | 0    | 1    | 228  | 1    | 0    | 0    | 1    | 1    | 2    | 0    | 5    | 1    | 0    | 2    | 0    | 0    | 1    |
| A418 | 2    | 2    | 1    | 1    | 0    | 2    | 0    | 4    | 4    | 0    | 0    | 1    | 80   | 3    | 60   | 4    | 2    | 3    | 1    | 2    | 1    | 0    | 4    | 4    | 0    | 1    |
| A420 | 0    | 0    | 0    | 0    | 0    | 1    | 0    | 1    | 0    | 0    | 0    | 0    | 3    | 51   | 3    | 0    | 0    | 0    | 38   | 1    | 0    | 0    | 0    | 1    | 0    | 0    |
| A434 | 0    | 2    | 0    | 0    | 1    | 2    | 0    | 3    | 4    | 0    | 0    | 0    | 60   | 3    | 491  | 2    | 1    | 2    | 1    | 3    | 5    | 0    | 3    | 2    | 1    | 0    |
| A440 | 10   | 12   | 6    | 6    | 1    | 3    | 2    | 30   | 21   | 12   | 0    | 1    | 4    | 0    | 2    | 114  | 5    | 6    | 2    | 21   | 3    | 0    | 6    | 3    | 12   | 2    |
| A476 | 2    | 13   | 1    | 0    | 0    | 51   | 1    | 8    | 4    | 2    | 1    | 1    | 2    | 0    | 1    | 5    | 132  | 6    | 0    | 14   | 0    | 0    | 55   | 3    | 2    | 0    |
| A482 | 3    | 6    | 2    | 5    | 1    | 0    | 0    | 4    | 6    | 2    | 0    | 2    | 3    | 0    | 2    | 6    | 6    | 67   | 0    | 9    | 4    | 0    | 4    | 3    | 4    | 1    |
| A608 | 0    | 0    | 0    | 1    | 0    | 1    | 0    | 1    | 0    | 0    | 0    | 0    | 1    | 38   | 1    | 2    | 0    | 0    | 146  | 1    | 0    | 0    | 0    | 1    | 0    | 0    |
| A622 | 9    | 12   | 6    | 10   | 1    | 3    | 1    | 16   | 21   | 3    | 1    | 5    | 2    | 1    | 3    | 21   | 14   | 9    | 1    | 143  | 2    | 1    | 8    | 2    | 6    | 1    |
| A623 | 1    | 3    | 1    | 3    | 1    | 0    | 1    | 4    | 3    | 0    | 0    | 1    | 1    | 0    | 5    | 3    | 0    | 4    | 0    | 2    | 13   | 0    | 3    | 0    | 1    | 1    |
| A636 | 0    | 0    | 0    | 0    | 0    | 0    | 0    | 0    | 0    | 0    | 0    | 0    | 0    | 0    | 0    | 0    | 0    | 0    | 0    | 1    | 0    | 37   | 0    | 0    | 0    | 0    |
| A670 | 5    | 16   | 3    | 3    | 1    | 1    | 1    | 14   | 8    | 0    | 0    | 2    | 4    | 0    | 3    | 6    | 55   | 4    | 0    | 8    | 3    | 0    | 277  | 4    | 1    | 1    |
| A792 | 1    | 2    | 0    | 0    | 0    | 1    | 2    | 4    | 2    | 0    | 0    | 0    | 4    | 1    | 2    | 3    | 3    | 3    | 1    | 2    | 0    | 0    | 4    | 27   | 0    | 0    |
| A809 | 3    | 3    | 0    | 0    | 1    | 1    | 0    | 7    | 3    | 11   | 0    | 0    | 0    | 0    | 1    | 12   | 2    | 4    | 0    | 6    | 1    | 0    | 1    | 0    | 190  | 0    |
| A832 | 1    | 1    | 1    | 1    | 1    | 0    | 0    | 1    | 4    | 0    | 1    | 1    | 1    | 0    | 0    | 2    | 0    | 1    | 0    | 1    | 1    | 0    | 1    | 0    | 0    | 9    |

**Supplementary Table 4** Matrix of the shared OTUs among samples of *Lecanora* spp. in the “no myco” dataset used for Fig. 6D.

|      | A227 | A243 | A360 | A368 | A418 | A434 | A482 | A670 | A832 |
|------|------|------|------|------|------|------|------|------|------|
| A227 | 9    | 0    | 1    | 0    | 0    | 1    | 1    | 1    | 1    |
| A243 | 0    | 18   | 0    | 0    | 0    | 0    | 0    | 1    | 0    |
| A360 | 1    | 0    | 77   | 0    | 4    | 4    | 6    | 8    | 4    |
| A368 | 0    | 0    | 0    | 2    | 0    | 0    | 0    | 0    | 1    |
| A418 | 0    | 0    | 4    | 0    | 80   | 60   | 3    | 4    | 1    |
| A434 | 1    | 0    | 4    | 0    | 60   | 491  | 2    | 3    | 0    |
| A482 | 1    | 0    | 6    | 0    | 3    | 2    | 67   | 4    | 1    |
| A670 | 1    | 1    | 8    | 0    | 4    | 3    | 4    | 277  | 1    |
| A832 | 1    | 0    | 4    | 1    | 1    | 0    | 1    | 1    | 9    |

**Supplementary Table 5** Matrix of the shared OTUs among samples of *Rhizocarpon geographicum* in the “no myco” dataset used for Fig. 6E.

|      | A172 | A194 | A405 |
|------|------|------|------|
| A172 | 172  | 5    | 2    |
| A194 | 5    | 109  | 1    |
| A405 | 2    | 1    | 228  |

**Supplementary Table 6** Matrix of the shared OTUs among samples of *Tephromela atra* in the “no myco” dataset used for Fig. 6F.

|      | A280 | A361 | A440 | A809 |
|------|------|------|------|------|
| A280 | 87   | 7    | 30   | 7    |
| A361 | 7    | 25   | 12   | 11   |
| A440 | 30   | 12   | 114  | 12   |
| A809 | 7    | 11   | 12   | 190  |

**Supplementary Table 7** Matrix of the shared OTUs belonging to Capnodiales in the complete dataset used for Fig. 7A.

|      | A280 | A360 | A440 | A622 | A809 |
|------|------|------|------|------|------|
| A280 | 7    | 1    | 2    | 1    | 0    |
| A360 | 1    | 1    | 0    | 1    | 0    |
| A440 | 2    | 0    | 2    | 0    | 0    |
| A622 | 1    | 1    | 0    | 9    | 0    |
| A809 | 0    | 0    | 0    | 0    | 21   |

**Supplementary Table 8** Matrix of the shared OTUs belonging to Chaetothyriales in the complete dataset used for Fig. 7B.

|      | A032 | A138 | A172 | A243 | A280 | A360 | A368 | A405 | A418 | A434 | A440 | A476 | A482 | A622 | A623 | A670 | A792 |
|------|------|------|------|------|------|------|------|------|------|------|------|------|------|------|------|------|------|
| A032 | 1    | 1    | 1    | 0    | 1    | 1    | 0    | 0    | 0    | 0    | 1    | 1    | 0    | 0    | 0    | 1    | 0    |
| A138 | 1    | 14   | 2    | 1    | 6    | 1    | 0    | 0    | 0    | 0    | 3    | 5    | 0    | 2    | 0    | 5    | 1    |
| A172 | 1    | 2    | 5    | 0    | 4    | 1    | 0    | 0    | 0    | 0    | 2    | 1    | 0    | 0    | 0    | 1    | 0    |
| A243 | 0    | 1    | 0    | 2    | 1    | 0    | 0    | 0    | 0    | 0    | 0    | 1    | 0    | 1    | 0    | 1    | 1    |
| A280 | 1    | 6    | 4    | 1    | 25   | 2    | 0    | 0    | 0    | 0    | 4    | 2    | 1    | 1    | 2    | 3    | 1    |
| A360 | 1    | 1    | 1    | 0    | 2    | 3    | 0    | 0    | 0    | 0    | 1    | 1    | 0    | 0    | 0    | 1    | 0    |
| A368 | 0    | 0    | 0    | 0    | 0    | 0    | 1    | 1    | 0    | 0    | 0    | 1    | 0    | 1    | 0    | 0    | 0    |
| A405 | 0    | 0    | 0    | 0    | 0    | 0    | 1    | 1    | 0    | 0    | 0    | 1    | 0    | 1    | 0    | 0    | 0    |
| A418 | 0    | 0    | 0    | 0    | 0    | 0    | 0    | 0    | 2    | 1    | 0    | 0    | 0    | 0    | 0    | 0    | 0    |
| A434 | 0    | 0    | 0    | 0    | 0    | 0    | 0    | 0    | 1    | 11   | 0    | 0    | 0    | 0    | 0    | 0    | 0    |
| A440 | 1    | 3    | 2    | 0    | 4    | 1    | 0    | 0    | 0    | 0    | 9    | 1    | 0    | 0    | 0    | 1    | 0    |
| A476 | 1    | 5    | 1    | 1    | 2    | 1    | 1    | 1    | 0    | 0    | 1    | 28   | 0    | 4    | 0    | 26   | 1    |
| A482 | 0    | 0    | 0    | 0    | 1    | 0    | 0    | 0    | 0    | 0    | 0    | 0    | 5    | 0    | 1    | 0    | 0    |
| A622 | 0    | 2    | 0    | 1    | 1    | 0    | 1    | 1    | 0    | 0    | 0    | 4    | 0    | 4    | 0    | 3    | 1    |
| A623 | 0    | 0    | 0    | 0    | 2    | 0    | 0    | 0    | 0    | 0    | 0    | 0    | 1    | 0    | 2    | 0    | 0    |
| A670 | 1    | 5    | 1    | 1    | 3    | 1    | 0    | 0    | 0    | 0    | 1    | 26   | 0    | 3    | 0    | 36   | 1    |
| A792 | 0    | 1    | 0    | 1    | 1    | 0    | 0    | 0    | 0    | 0    | 0    | 1    | 0    | 1    | 0    | 1    | 1    |

**Supplementary Table 9** Matrix of the shared OTUs belonging to Tremellales in the complete dataset used for Fig. 7C.

|      | A138 | A280 | A360 | A418 | A434 | A440 | A476 | A482 | A608 | A622 | A623 | A670 | A792 |
|------|------|------|------|------|------|------|------|------|------|------|------|------|------|
| A138 | 1    | 1    | 0    | 0    | 0    | 1    | 0    | 0    | 0    | 0    | 0    | 0    | 0    |
| A280 | 1    | 3    | 1    | 0    | 0    | 2    | 0    | 0    | 0    | 0    | 1    | 1    | 0    |
| A360 | 0    | 1    | 4    | 2    | 1    | 1    | 1    | 1    | 0    | 2    | 1    | 2    | 1    |
| A418 | 0    | 0    | 2    | 4    | 1    | 0    | 2    | 2    | 0    | 1    | 0    | 1    | 2    |
| A434 | 0    | 0    | 1    | 1    | 1    | 0    | 1    | 1    | 0    | 1    | 0    | 1    | 1    |
| A440 | 1    | 2    | 1    | 0    | 0    | 2    | 0    | 0    | 0    | 0    | 1    | 1    | 0    |
| A476 | 0    | 0    | 1    | 2    | 1    | 0    | 2    | 2    | 0    | 1    | 0    | 1    | 2    |
| A482 | 0    | 0    | 1    | 2    | 1    | 0    | 2    | 3    | 0    | 1    | 0    | 1    | 3    |
| A608 | 0    | 0    | 0    | 0    | 0    | 0    | 0    | 0    | 0    | 0    | 0    | 0    | 0    |
| A622 | 0    | 0    | 2    | 1    | 1    | 0    | 1    | 1    | 0    | 3    | 0    | 1    | 1    |
| A623 | 0    | 1    | 1    | 0    | 0    | 1    | 0    | 0    | 0    | 0    | 1    | 1    | 0    |
| A670 | 0    | 1    | 2    | 1    | 1    | 1    | 1    | 1    | 0    | 1    | 1    | 2    | 1    |
| A792 | 0    | 0    | 1    | 2    | 1    | 0    | 2    | 3    | 0    | 1    | 0    | 1    | 4    |

**Supplementary Table 10** Number of OTUs and corresponding reads of two cultured fungi (A930 and 1022, Muggia *et al.* 2016), found in the complete dataset. The reads found in samples with the same lichen-lichenicolous fungus combination from which culture was isolated are highlighted in bold.

|        | Cultured fungus             |                                               |
|--------|-----------------------------|-----------------------------------------------|
|        | A930                        | A1022                                         |
| Sample |                             |                                               |
| A032   | OTU47 (116)                 | -                                             |
| A138   | OTU47 (11)                  | -                                             |
| A172   | OTU47 (57)                  | -                                             |
| A194   | OTU47 (426)                 | -                                             |
| A227   | -                           | -                                             |
| A229   | -                           | -                                             |
| A243   | -                           | -                                             |
| A280   | OTU47 (37)                  | -                                             |
| A360   | OTU47 (246)                 | OTU9873 (37),<br>OTU3048 (1),<br>OTU10383 (1) |
| A361   | -                           | -                                             |
| A368   | -                           | -                                             |
| A405   | OTU47 (3)                   | -                                             |
| A418   | OTU47 (2)                   | -                                             |
| A420   | -                           | -                                             |
| A434   | -                           | -                                             |
| A440   | <b>OTU47 (131)</b>          | -                                             |
| A476   | -                           | -                                             |
| A482   | OTU47 (12)                  | -                                             |
| A608   | -                           | -                                             |
| A622   | OTU47 (572),<br>OTU8759 (2) | -                                             |
| A623   | OTU47 (1)                   | -                                             |
| A636   | -                           | -                                             |
| A670   | OTU47 (1)                   | -                                             |
| A792   | -                           | -                                             |
| A809   | -                           | -                                             |
| A832   | OTU47 (1)                   | OTU9873 (57),<br>OTU3048 (1),<br>OTU10383 (1) |
